# Supplementary material
Source: Research Square preprint supplement (doi:10.21203/rs.3.rs-9134526/v1)
Supplement: Supplementary file 2 [file bbb07fda1807b7d04b343449.docx]

**Comparative Gut Microbiota Profiling of Obese and Normal-Weight Indian Adults Using 16S rRNA Sequencing**

*Ranjeet Kumar Vishwakarma1, Priyanka Gautam2, Minakshi Sahu3, Gopal Nath3, *Bhupendra Singh Yadav1,*

**Supplementary information**


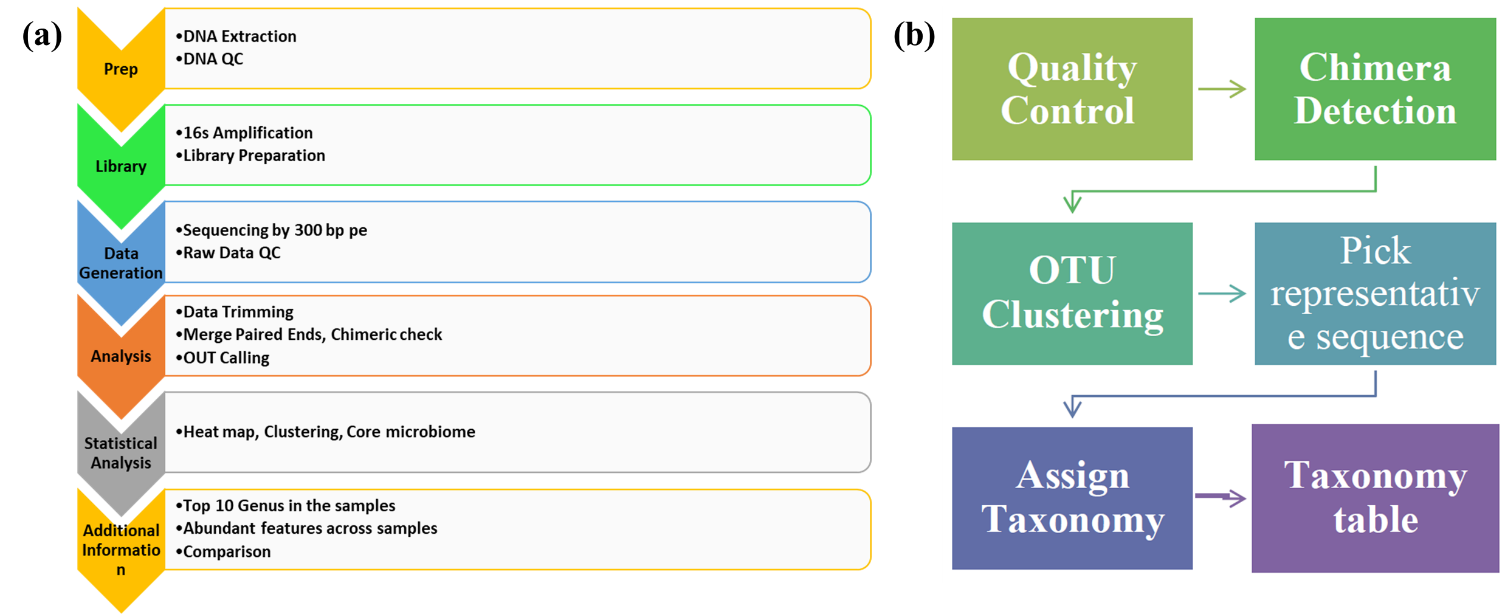


**Fig S1:** Workflow for data filtration and processing

**
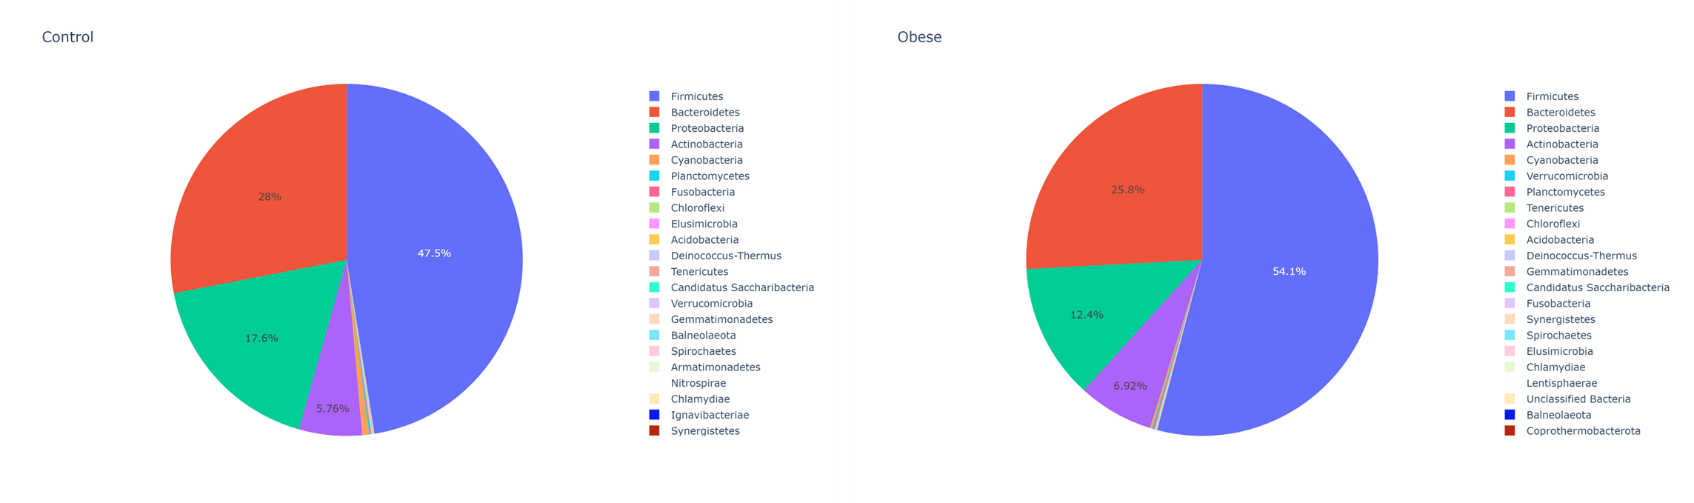
**

**Fig S2:** Average for both the control and obese groups at the phylum level

**
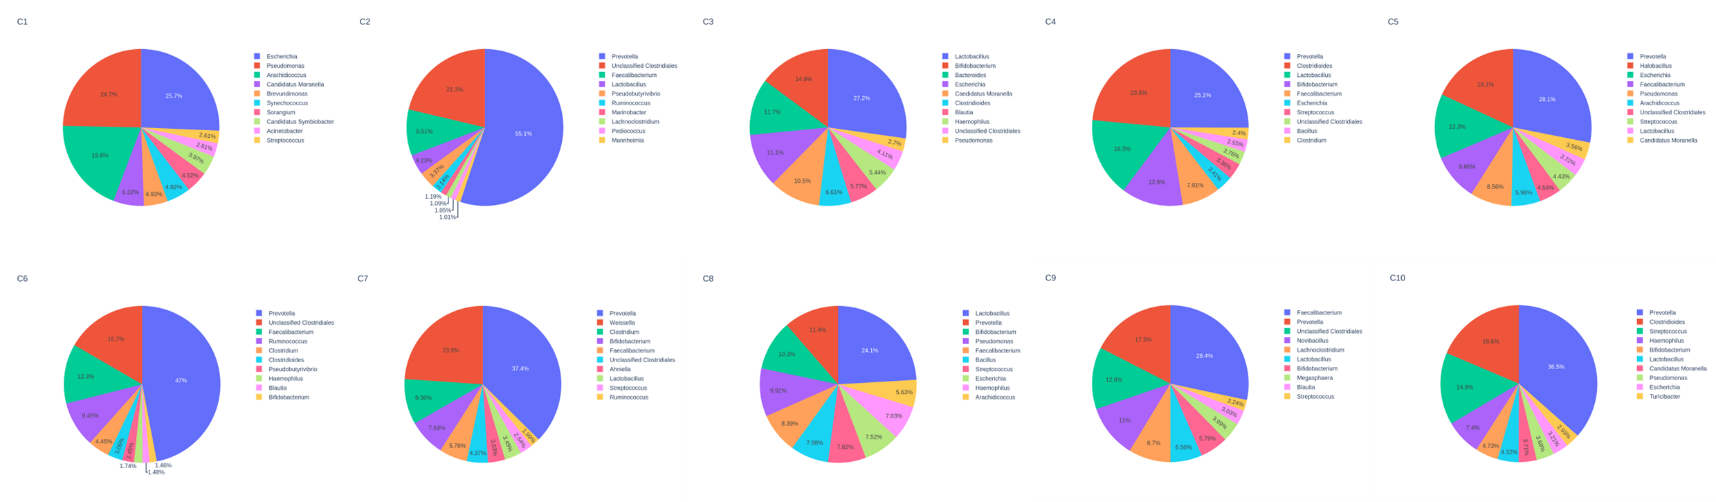
**

**Fig S3 (a):** Top 10 genera in control individuals (C1-C10) are shown in a pie chart

**
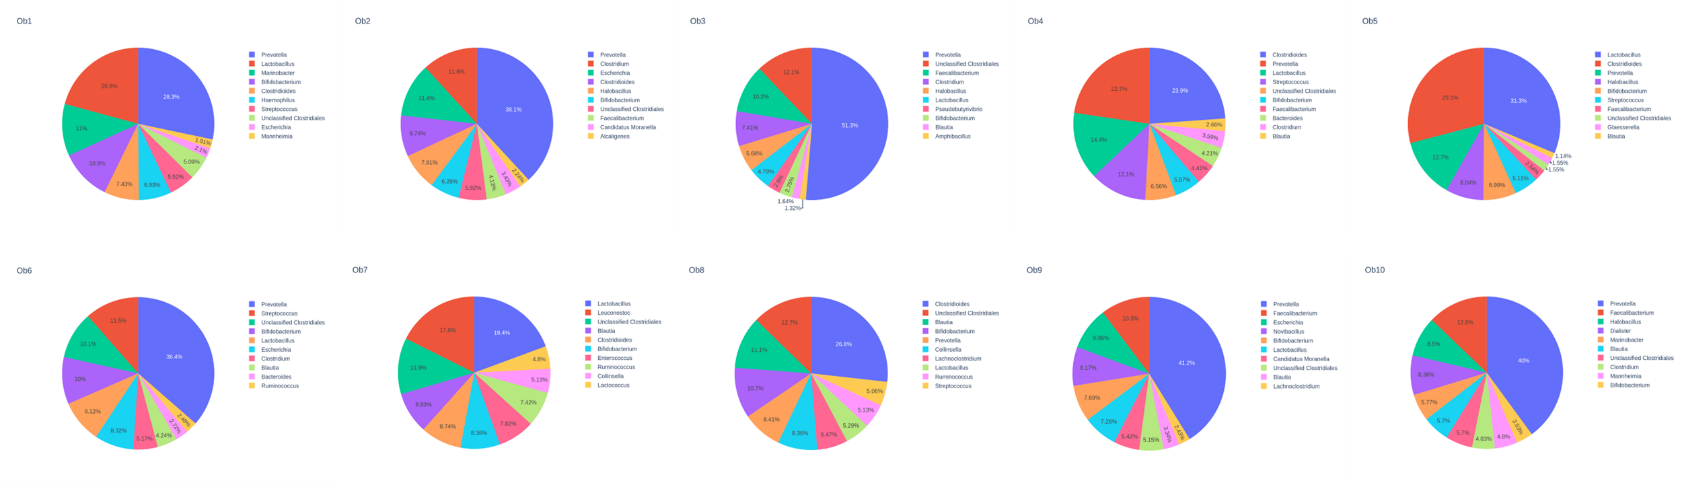
**

**Fig S3 (b):** Top 10 genera in obese individuals (Ob1-Ob10) show in a pie chart

**
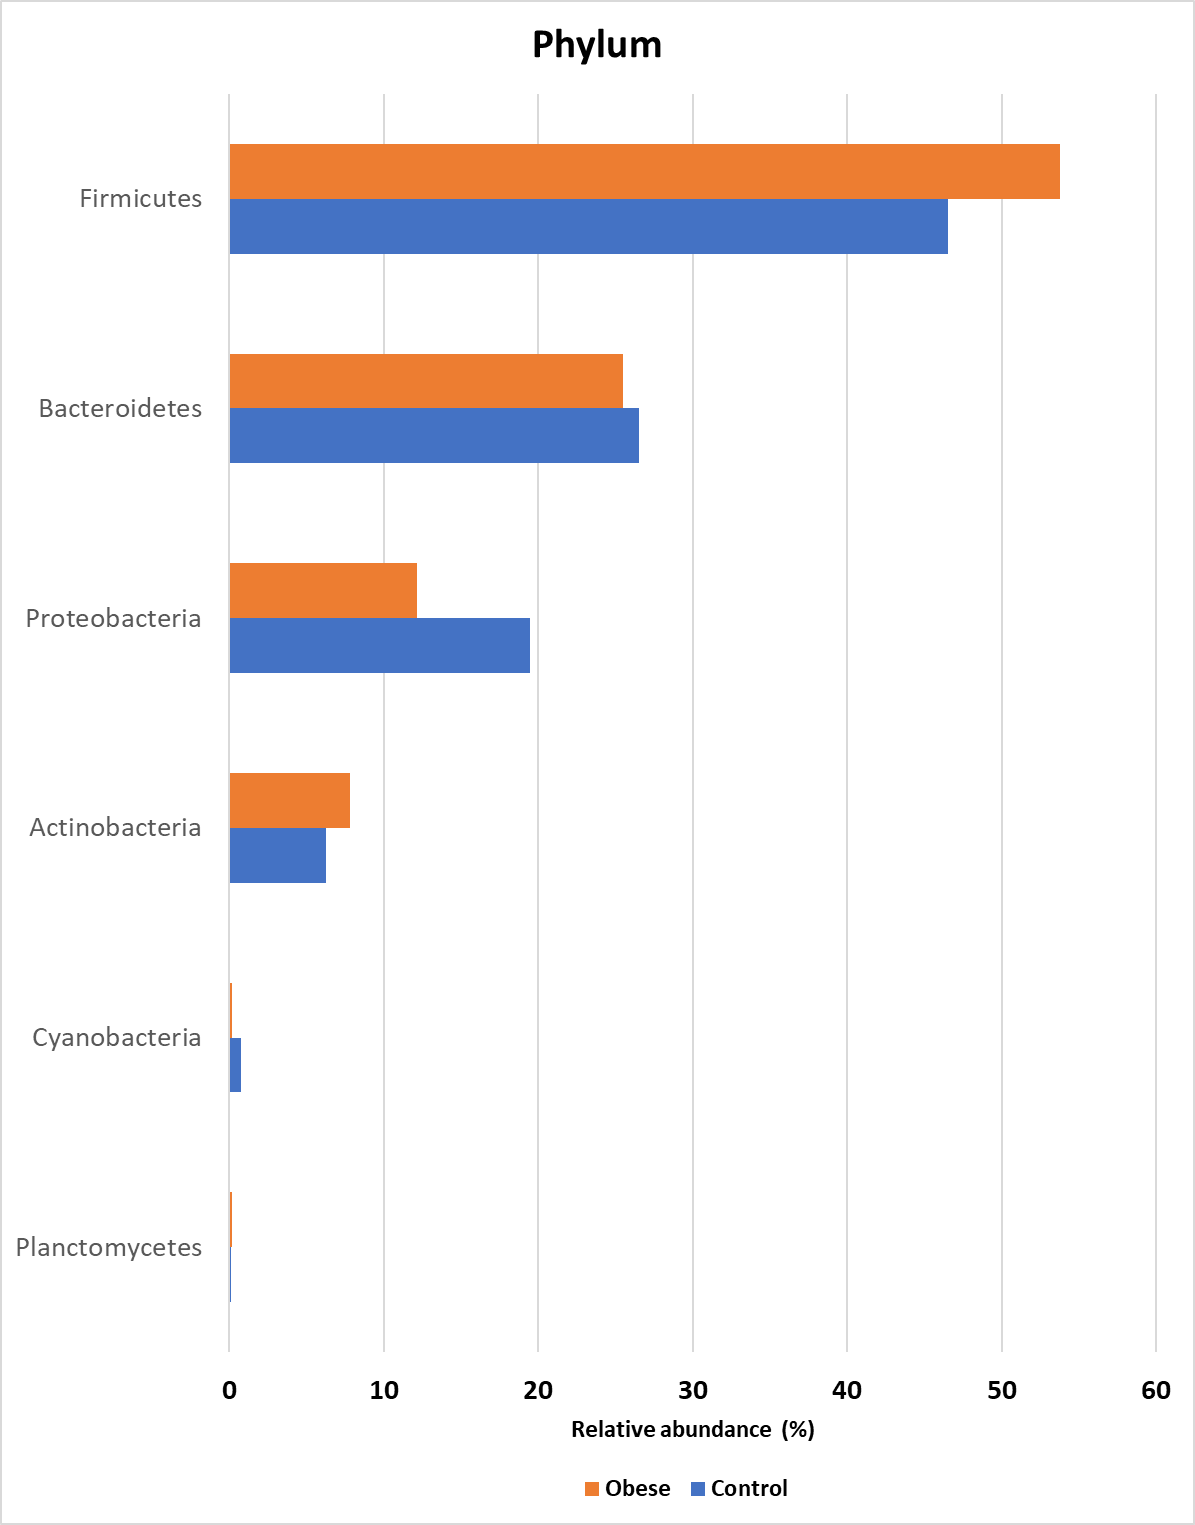
**

**Fig S4:** Abundant phylum detected in the control and obese individuals (excluding phylum detected in lower than 0.1% of relative abundance among the samples).

**Table S1:** Relative abundance at the genus level in both control and obese groups

| **Genera** | **Control Mean** | **Obese Mean** | ***p-value*** |
| --- | --- | --- | --- |
| *Acholeplasma* | 0.00172472 | 0.0261805 | 0.015 |
| *Anaerostipes* | 0.104874 | 0.520763 | 0.013 |
| *Anaplasma* | 0.00247746 | 0.000421479 | 0.054 |
| *Desulfarculus* | 0.00247199 | 0.000260729 | 0.057 |
| *Dichelobacter* | 0.00304768 | 0.000203126 | 0.024 |
| *Eggerthella* | 0.0212655 | 0.0962759 | 0.034 |
| *Fusobacterium* | 0.0604624 | 0.00908309 | 0.059 |
| *Halomonas* | 0.0412798 | 0.00643941 | 0.054 |
| *Leptotrichia* | 0.0176522 | 0.00226913 | 0.024 |
| *Magnetospirillum* | 0.00343493 | 0.0592241 | 0.032 |
| *Micavibrio* | 0.0218257 | 0.00271756 | 0.057 |
| *Paenarthrobacter* | 0.0154231 | 0.00343272 | 0.041 |
| *Pantoea* | 0.0322434 | 0.00704892 | 0.050 |
| *Phascolarctobacterium* | 0.0072549 | 0.109449 | 0.045 |
| *Ramlibacter* | 0.00114776 | 0 | 0.050 |
| *Rhodopirellula* | 0.000837929 | 0 | 0.017 |
| *Rhodothermus* | 0.00122603 | 0 | 0.026 |
| *Serratia* | 0.0742308 | 0.0133752 | 0.044 |


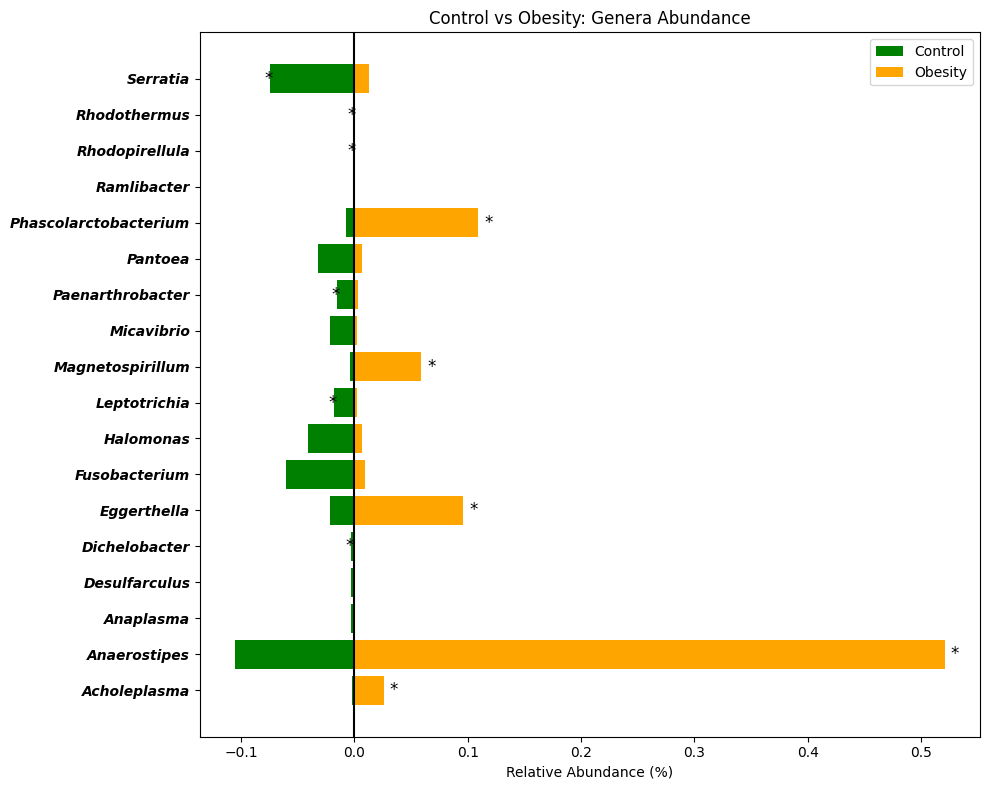


**Fig S5 (a):** Relative abundance at the genus level in both control and obese groups


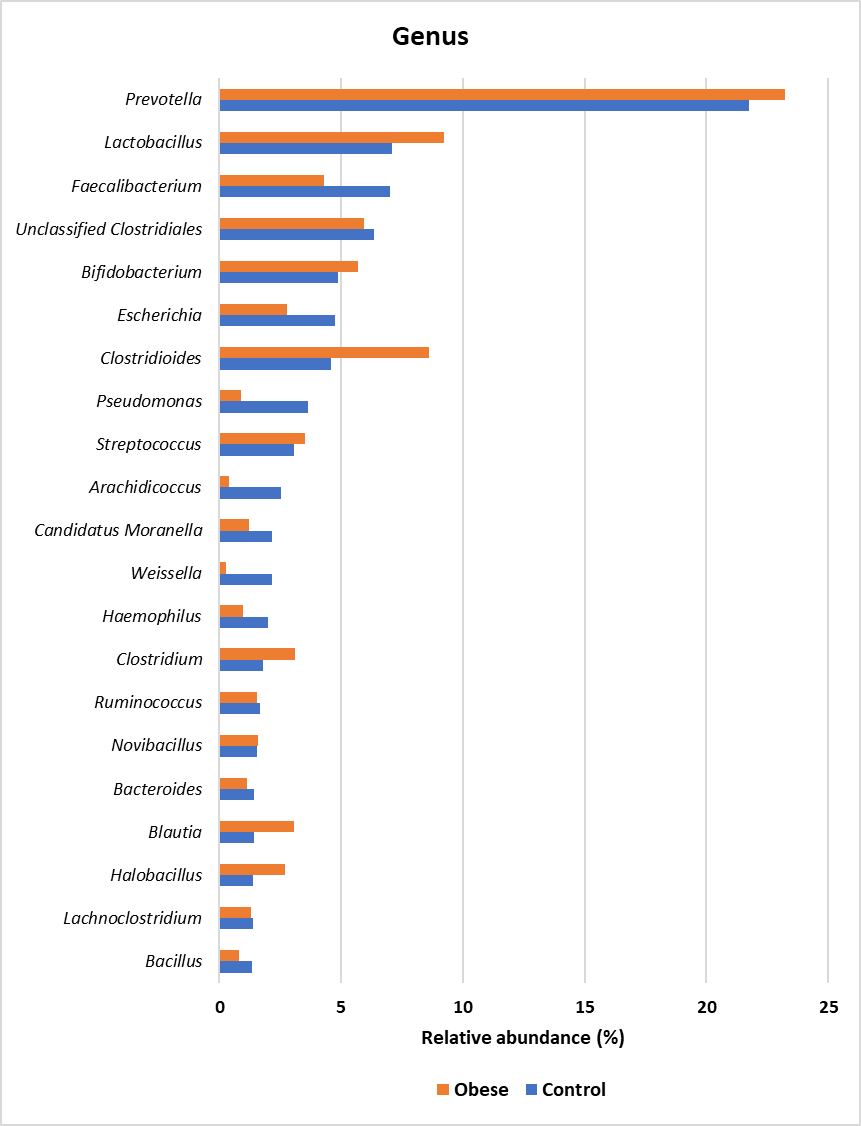


**Fig S5 (b):** Abundant genus detected in the control and obese individuals (excluding species detected in lower than 1% of relative abundance among the samples).


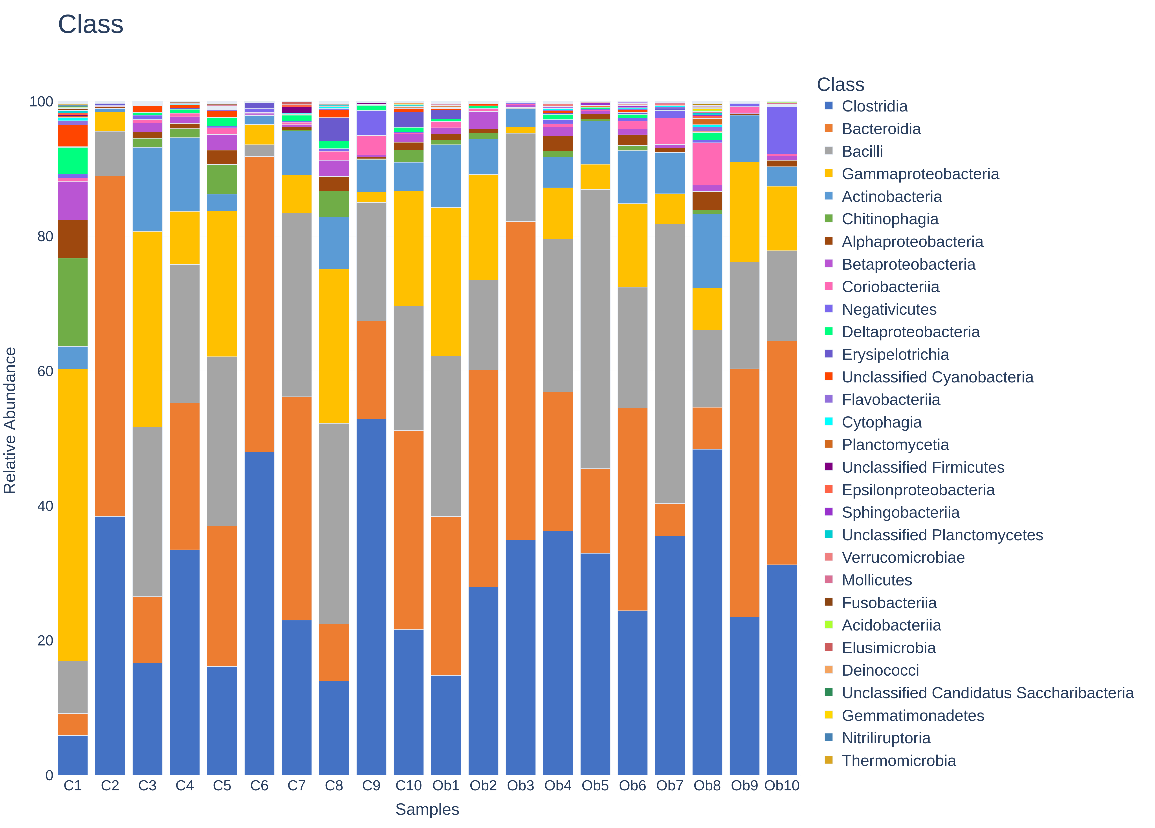


**Fig S6:** Class-level gut microbiome composition of control and obese individuals (excluding classes detected in lower than 1% of relative abundance among the samples).


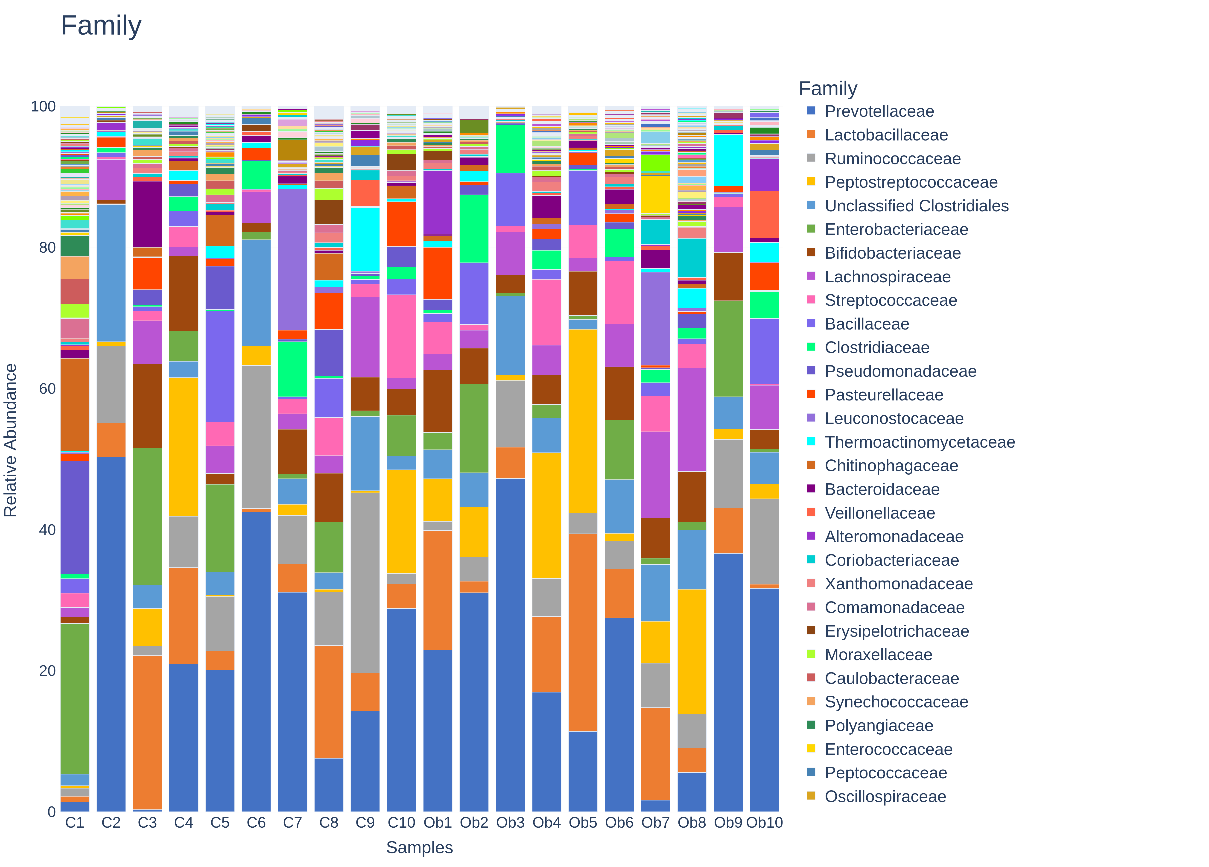


**Fig S7:** Family-level gut microbiome composition of control and obese individuals (excluding families detected in lower than 1% of relative abundance among the samples).


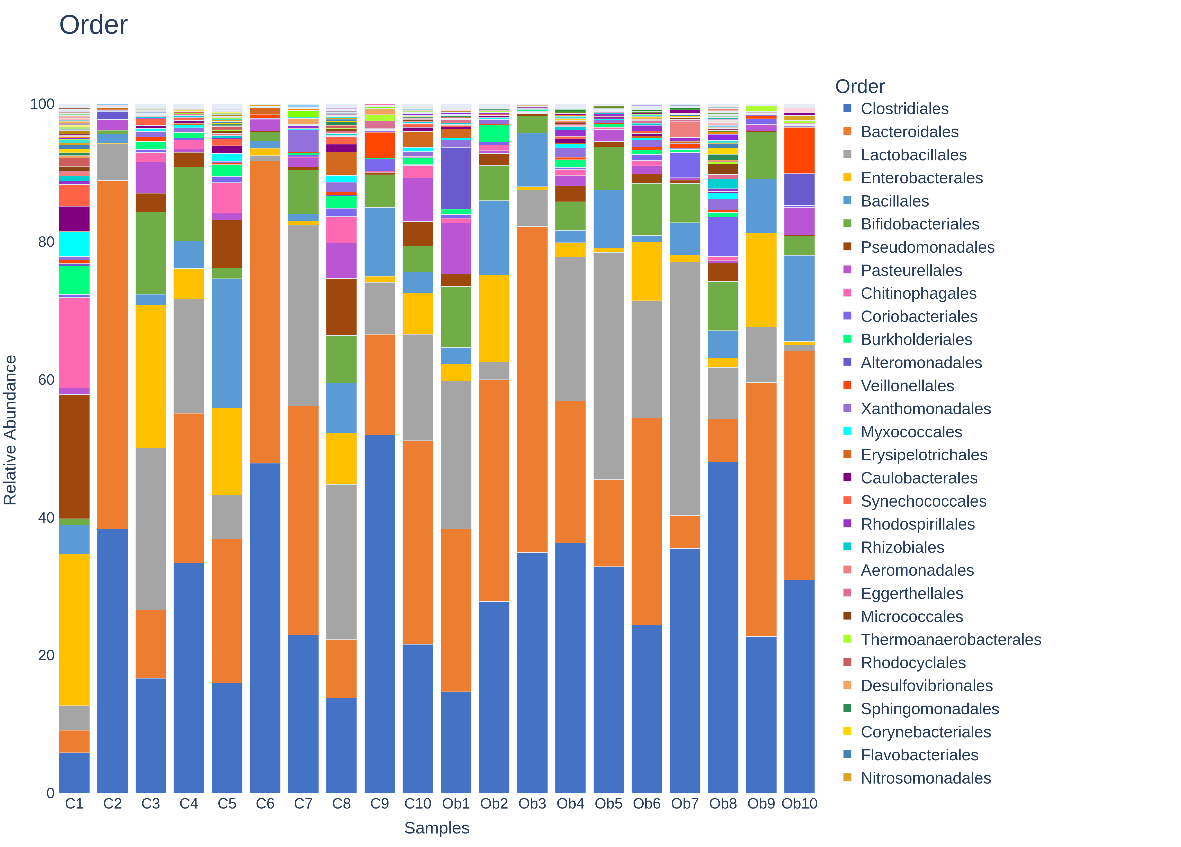


**Fig S8:** Order-level gut microbiome composition of control and obese individuals (excluding orders detected in less than 1% of relative abundance among the samples).


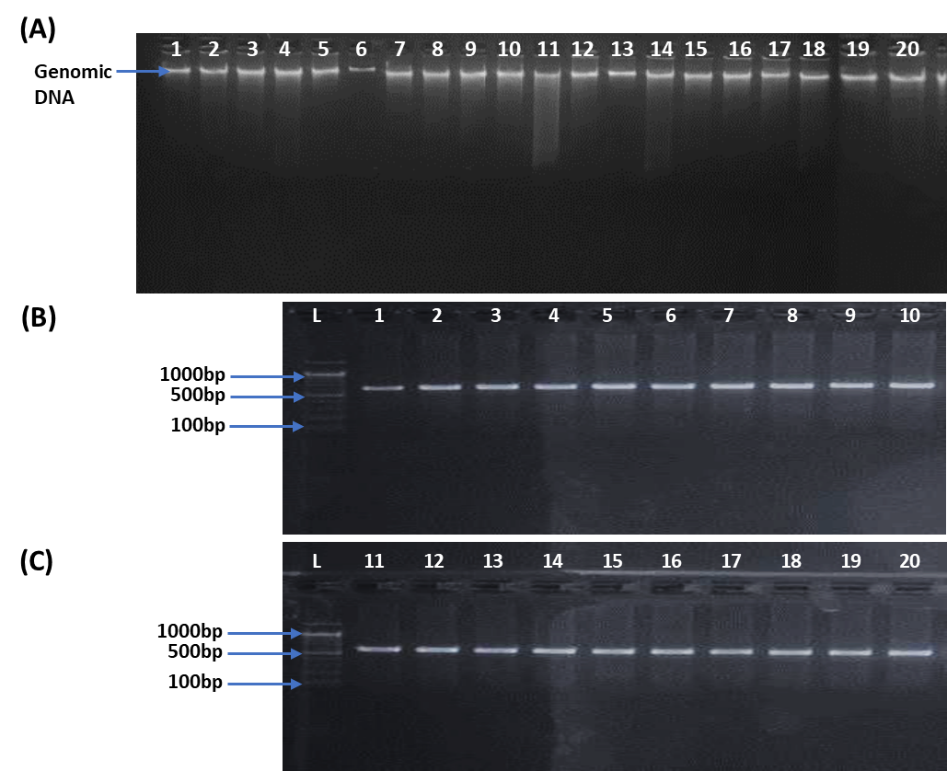


**Fig S9:** Isolated genomic DNA from obese and control subjects shows distinct gel electrophoresis bands, indicating similar quality and quantity, **(b-c)** Shows PCR results of 16s rRNA primers on DNA from obese and control subjects; gel electrophoresis displays clear bands indicating successful amplification.
