# Supplementary material
Source: Research Square preprint supplement (doi:10.21203/rs.3.rs-9134526/v1)

**Graphical abstract**


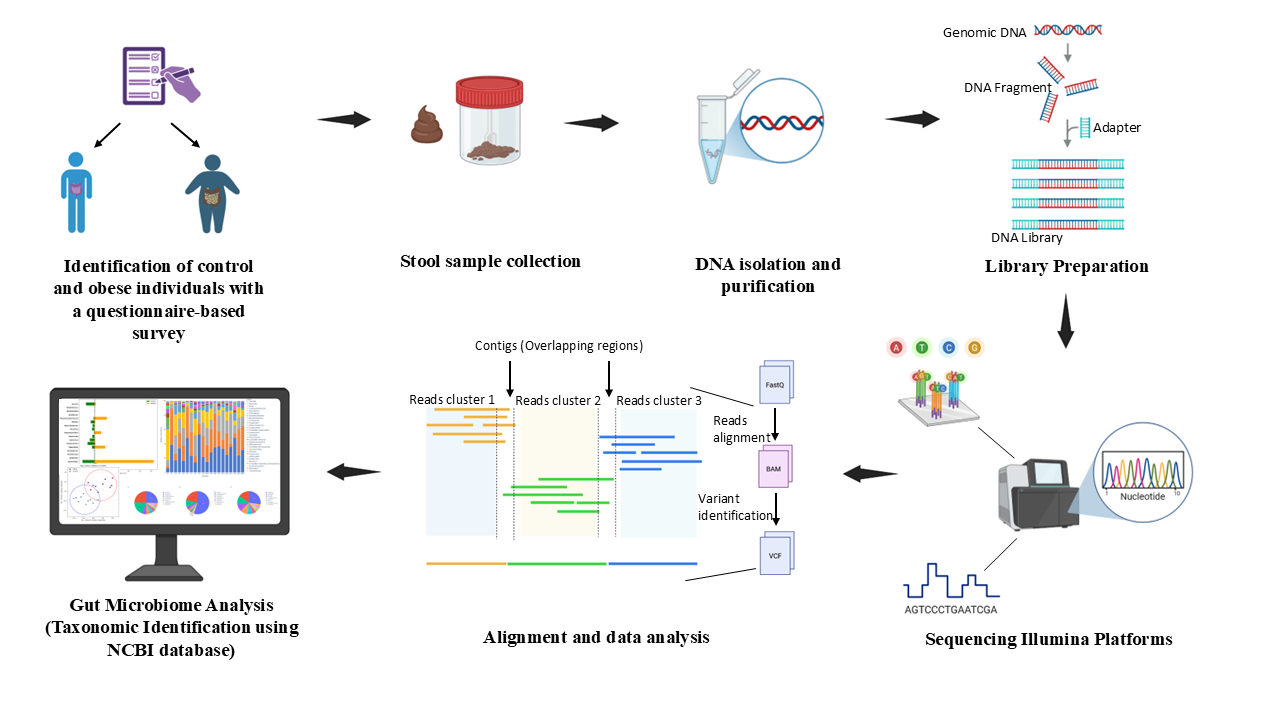

Supplement: Supplementary file 1 [file b8d62d43173dcd55576d46e5.docx]
